# Supplementary material for: Frequency, prognostic impact, and subtype association of 8p12, 8q24, 11q13, 12p13, 17q12, and 20q13 amplifications in breast cancers
Source: BMC Cancer. 2006 Oct 13;6:245. doi: 10.1186/1471-2407-6-245 (PMC1626089; doi:10.1186/1471-2407-6-245)
Supplement: Additional file 2 — Correlation between amplified regions determined by FISH and histoclinical factors.xls [file 1471-2407-6-245-S2.xls]

## Sheet: Feuil1
Additional file 2 - Correlation between amplified regions determined by FISH and histoclinical factors
Characteristics	8p12			8q24			11q13			12p13			17q12			20q13Z			20q13Co
	Amplification	No Amplification	p-value	Amplification	No Amplification	p-value	Amplification	No Amplification	p-value	Amplification	No Amplification	p-value	Amplification	No Amplification	p-value	Amplification	No Amplification	p-value	Amplification	No Amplification	p-value
	No. of patients (%)			No. of patients (%)			No. of patients (%)			No. of patients (%)			No. of patients (%)			No. of patients (%)			No. of patients (%)
Number of tumors analyzed (%)	50 (22.8%)	169 (77.2%)		15 (6.1%)	231 (93.9%)		58 (19.6%)	238 (80.4%)		13 (4.1%)	305 (95.9%)		27 (9.9%)	245 (90.1%)		23 (9.9%)	210 (90.1%)		23 (8.5%)	247 (91.5%)
Age, years
<50	17 (34)	49 (29)	NS	5 (33.3)	69 (29.9)	NS	15 (25.9)	69 (29)	NS	4 (30.8)	91 (29.8)	NS	7 (26)	75 (30.6)	NS	8 (34.8)	59 (28.1)	NS	5 (21.7)	81 (32.8)	NS
≥50	33 (66)	120 (71)		10 (66.7)	162 (70.1)		43 (74.1)	169 (71)		9 (69.2)	214 ( 70.2)		20 (74)	170 (69.4)		15 (65.2)	151 (71.9)		18 (78.3)	166 (67.2)
Histological type
ductal	38 (76)	129 (76.3)		12 (80)	176 (76.2)		45 (77.6)	178 (74.8)		13 (100)	217 (71.1)		25 (92.6)	174 (71.3)		20 (87)	156 (74.3)		22 (95.7)	177 (71.7)
lobular	3 (6)	18 (10.7)	NS	1 (6.7)	22 (9.5)	NS	5 (8.6)	22 (9.2)	NS	0 (0)	39 (12.8)	NS	1 (3.7)	30 (12.3)	NS	0 (0)	23 (10.9)	NS	0 (0)	30 (12.1)	NS
medullary	0 (0)	3 (1.8)		0 (0)	3 (1.3)		0 (0)	6 (2.5)		0 (0)	6 (2)		0 (0)	3 (1.2)		0 (0)	4 (1.9)		0 (0)	5 (2)
other	9 (18)	19 (11.2)		2 (13.3)	30 (13)		8 (13.8)	32 (13.5)		0 (0)	43 (14.1)		1 (3.7)	37 (15.2)		3 (13)	27 (12.9)		1 (4.3)	35 (14.2)
Pathological tumor size
pT1	23 (46)	75 (44.4)		6 (40)	95 (41.1)		17 (29.3)	106 (44.5)		7 (53.8)	131 (42.9)		13 (48.2)	101 (41.2)		9 (39.1)	88 (41.9)		7 (30.4)	106 (42.9)
pT2	22 (44)	73 (43.2)	NS	9 (60)	107 (46.3)	NS	31 (53.5)	109 (45.8)	NS	4 (30.8)	132 (43.3)	NS	11 (40.7)	113 (46.1)	NS	12 (52.2)	94 (44.8)	NS	14 (60.9)	107 (43.3)	NS
pT3	5 (10)	21 (12.4)		0 (0)	29 (12.6)		10 (17.2)	23 (9.7)	p = 0.06139	2 (15.4)	42 (13.8)		3 (11.1)	31 (12.7)		2 (8.7)	28 (13.3)		2 (8.7)	34 (13.8)
SBR grade
I	7 (14)	46 (27.2)		1 (6.7)	62 (26.8)		13 (22.4)	72 (30.2)		0 (0)	98 (32.1)		2 (7.4)	71 (29)		4 (17.4)	59 (28.1)		1 (4.3)	76 (30.8)
II	21 (42)	75 (44.4)	NS	5 (33.3)	111 (48)	p = 0.01015	27 (46.6)	103 (43.3)	NS	6 (46.2)	129 (42.3)	p = 0.01878	10 (37)	112 (45.7)	p = 0.001944	9 (39.1)	96 (45.7)	NS	12 (52.2)	106 (42.9)	p = 0.0203
III	22 (44)	48 (28.4)	p = 0.05578	9 (60)	58 (25.2)		18 (31)	63 (26.5)		7 (53.8)	78 (25.6)		15 (55.6)	62 (25.3)		10 (43.5)	55 (26.2)		10 (43.5)	65 (26.3)
Peritumoral vascular invasion
absent	32 (64)	101 (60.1)	NS	6 (40)	144 (62.6)	NS	36 (62.1)	149 (62.9)	NS	12 (92.3)	184 (60.5)	p = 0.04355	13 (48.1)	150 (61.5)	NS	17 (73.9)	130 (62.2)	NS	11 (47.8)	159 (64.6)	NS
present	18 (36)	67 (39.9)		9 (60)	86 (37.4)		22 (37.9)	88 (37.1)		1 (7.7)	120 (39.5)		14 (51.9)	94 (38.5)		6 (26.1)	79 (37.8)		12 (52.2)	87 (35.4)
Axillary lymph node status
negative	25 (50)	90 (53.6)	NS	7 (46.7)	124 (54)	NS	27 (46.6)	135 (57)	NS	7 (53.8%)	161 (53)	NS	10 (37)	131 (53.7)	NS	11 (47.8)	114 (54.5)	NS	5 (21.7)	138 (56.1)	p = 0.003289
positive	25 (50)	78 (46.4)		8 (53.3)	106 (46)		31 (53.4)	102 (43)		6 (46.2%)	143 (47)		17 (63)	113 (46.3)		12 (52.2)	95 (45.5)		18 (78.3)	108 (43.9)
Estrogen receptor status
negative	11 (22.4)	41 (24.8)	NS	7 (46.7)	43 (18.7)	p = 0.02298	9 (15.8)	54 (22.9)	NS	8 (61.5)	54 (17.9)	p = 0.0004311	17 (63%)	44 (18.1)	p = 4.537e-07	6 (27.3)	45 (21.6)	NS	2 (9.1)	54 (22.2)	NS
positive	38 (77.6)	124 (75.2)		8 (53.3)	187 (81.3)		48 (84.2)	182 (77.1)		5 (38.5)	248 (82.1)		10 (37%)	199 (81.9)		16 (72.7)	163 (78.4)		20 (90.9)	189 (77.8)
Progesterone receptor status
negative	14 (29.8)	57 (34.5)	NS	6 (40)	74 (32.9)	NS	18 (31.6)	74 (32)	NS	8 (66.7)	94 (31.4)	p = 0.02540	18 (69.2)	68 (28.6)	p = 6.894e-05	13 (59.1)	70 (34.3)	p = 0.03962	5 (21.7)	80 (33)	NS
positive	33 (70.2)	108 (65.5)		9 (60)	151 (67.1)		39 (68.4)	157 (68)		4 (33.3)	205 (68.6)		8 (30.8)	170 (71.4%)		9 (40.9)	134 (65.7)		18 (78.3)	162 (67)
ERBB2 status
0-1	40 (87)	136 (85.5)	NS	8 (72.7)	197 (88.7)	NS	48 (90.6)	192 (86.9)	NS	11 (84.6)	255 (87.6)	NS	1 (4)	213 (93.4)	p < 2.2e-16	19 (90.5)	169 (86.7)	NS	21 (95.5)	207 (88.5)	NS
2-3	6 (13)	23 (14.5)		3 (27.3)	25 (11.3)		5 (9.4)	29 (13.1)		2 (15.4)	36 (12.4)		24 (96)	15 (6.6)		2 (9.5)	26 (13.3)		1 (4.5)	27 (11.5)
P53 status
negative	38 (77.6)	111 (68.5)	NS	8 (57.1)	159 (74)	NS	46 (80.7)	158 (70.2)	NS	6 (46.2%)	217 (74.6)	NS	15 (55.6)	163 (71.2)	NS	11 (47.8)	146 (73.7)	p = 0.01875	16 (72.7)	169 (71.9)	NS
positive	11 (22.4)	51 (31.5)		6 (42.9)	56 (26)		11 (19.3)	67 (29.8)		7 (53.8%)	74 (25.4)	p = 0.05156	12 (44.4)	66 (28.8)		12 (52.2)	52 (26.3)		6 (27.3)	66 (28.1)
Ki67 status
<20	28 (62.2)	120 (80)	p = 0.02465	6 (50)	163 (78)	NS	38 (67.9)	170 (79.1)	NS	6 (46.2)	220 (80)	p = 0.01059	15 (60)	177 (81.2)	p = 0.02743	14 (63.6)	141 (77)	NS	18 (81.8)	173 (76.2)	NS
≥20	17 (37.8)	30 (20)		6 (50)	46 (22)	p = 0.06107	18 (32.1)	45 (20.9)		7 (53.8)	55 (20)		10 (40)	41 (18.8)		8 (36.4)	42 (23)		4 (18.2)	54 (23.8)
NS: Not significant
